# Supplementary material for: Patients’ and Relatives’ Preferences for a Palliative/Oncology Day Ward and Out-of-Hours Telemedicine—An Interpretive Description
Source: MDPI journal article supplement (doi:10.3390/healthcare9060758), 2021-06-18
Supplement: s1 [file s1]

Supplementary material:

**Table S1.** Interview guide.

| Area                         | Question                                                                                                                               | Prompts –if necessary                                                                                                                                                                                                                                                                                                     |
|------------------------------|----------------------------------------------------------------------------------------------------------------------------------------|---------------------------------------------------------------------------------------------------------------------------------------------------------------------------------------------------------------------------------------------------------------------------------------------------------------------------|
| Question 1 – day ward        | What do you think about receiving treatment on a day ward rather than being admitted to the ward for treatment?                        |                                                                                                                                                                                                                                                                                                                           |
| Question 2 - telemedicine    | What do you think about using a screen* to contact staff on the ward when the day ward is closed?                                      |                                                                                                                                                                                                                                                                                                                           |
| Question 3 - Arrival         | What are your preferences in relation to the lay out of the day ward?                                                                  | <ul style="list-style-type: none"> <li>- Signs, waiting room</li> <li>- Opening hours</li> <li>- Reception</li> <li>- Information on arrival etc</li> <li>- Information to family</li> </ul>                                                                                                                              |
| Question 4 - Under visit     | What are your preferences in during your visit to the day ward?                                                                        | <ul style="list-style-type: none"> <li>- Expectations to staff</li> <li>- Information prior to visit</li> <li>- Understandable information</li> <li>- Participation in decision making to the extent that one can</li> <li>- Consent to inform relatives</li> <li>- Managing one's illness</li> </ul>                     |
| Question 5 – Returning home. | What would be important for you when returning home from a visit to the day ward?                                                      | <ul style="list-style-type: none"> <li>- Information about symptoms, side effects of medicine, treatment plan and follow-up</li> <li>- Consideration of individual needs</li> <li>- Information on how to contact staff</li> <li>- Introduction to telemedicine</li> <li>- Co-operation with GP/district nurse</li> </ul> |
| Closing question             | Have you any other comments about your preferences in relation to treatment on a day ward and out-of-hours video consultation support? |                                                                                                                                                                                                                                                                                                                           |
